# Supplementary material for: Visualization of internal 3D structure of small live seed on germination by laboratory-based X-ray microscopy with phase contrast computed tomography
Source: PubMed Central journal article supplement (PMC6995115; doi:10.1186/s13007-020-0557-y), 2020-02-01
Supplement: 13007_2020_557_MOESM1_ESM.pdf [file 13007_2020_557_MOESM1_ESM.pdf]

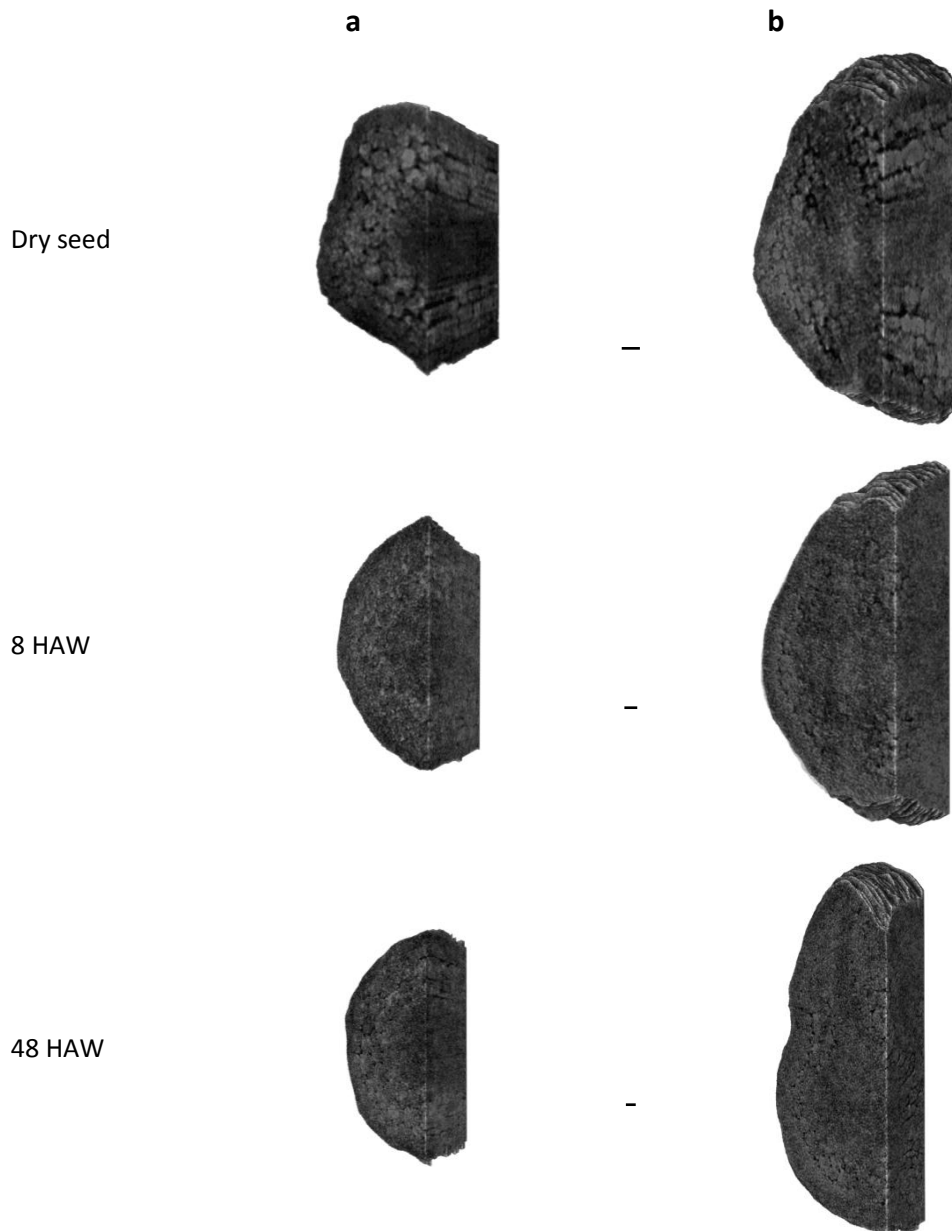

**Fig. S1** Internal 3D-structure of pansy seed at three stages of germination. Two 3D-rendering models produced by *Drishti* are represented for 220 CT slices **a** from 2/7 toward 3/7 and **b** from 4/7 toward 5/7 of seeds at three different stages of the germination as shown in Fig. 4c. The models are tilted to the left by  $30^\circ$  to show longitudinal sections. Lateral grooves on the embryo surface are artifacts due to a technical limitation of the manual segmentation. Scale bars: 20  $\mu\text{m}$
